# Supplementary material for: Ab initio neural network MD simulation of thermal decomposition of a high energy material CL-20/TNT
Source: Royal Society of Chemistry journal article supplement (doi:10.1039/d2cp00710j), 2022-01-01
Supplement: d2cp00710j1.pdf [file d2cp00710j1.pdf]

## Supplementary Information

### Ab Initio Neural Network MD Simulation of Thermal Decomposition of High Energy Material CL-20/TNT

Liqun Cao<sup>1</sup>, Jinzhe Zeng<sup>5</sup>, Bo Wang<sup>1</sup>, Tong Zhu<sup>\*1,3</sup> and John Z.H. Zhang<sup>\*1,2,3,4,6</sup>

<sup>1</sup>Shanghai Engineering Research Center of Molecular Therapeutics & New Drug Development, School of Chemistry and Molecular Engineering, East China Normal University, Shanghai, 200062, China

<sup>2</sup>Shenzhen Institute of Synthetic Biology, Shenzhen Institutes of Advanced Technology, Chinese Academy of Sciences, Shenzhen, Guangdong, China.

<sup>3</sup>NYU-ECNU Center for Computational Chemistry at NYU Shanghai, Shanghai, 200062, China

<sup>4</sup>Department of Chemistry, New York University, New York 10003, United States

<sup>5</sup>Department of Chemistry and Chemical Biology, Institute for Quantitative Biomedicine, Rutgers, the State University of New Jersey, Piscataway 08854-8076, NJ, USA

<sup>6</sup>Collaborative Innovation Center of Extreme Optics, Shanxi University, Taiyuan, Shanxi, 030006,

\*Email: [tzhu@lps.ecnu.edu.cn](mailto:tzhu@lps.ecnu.edu.cn), [john.zhang@nyu.edu](mailto:john.zhang@nyu.edu)

\*Email: [tzhu@lps.ecnu.edu.cn](mailto:tzhu@lps.ecnu.edu.cn), [john.zhang@nyu.edu](mailto:john.zhang@nyu.edu)

#### 1. More results from the MD simulations with NNPs.

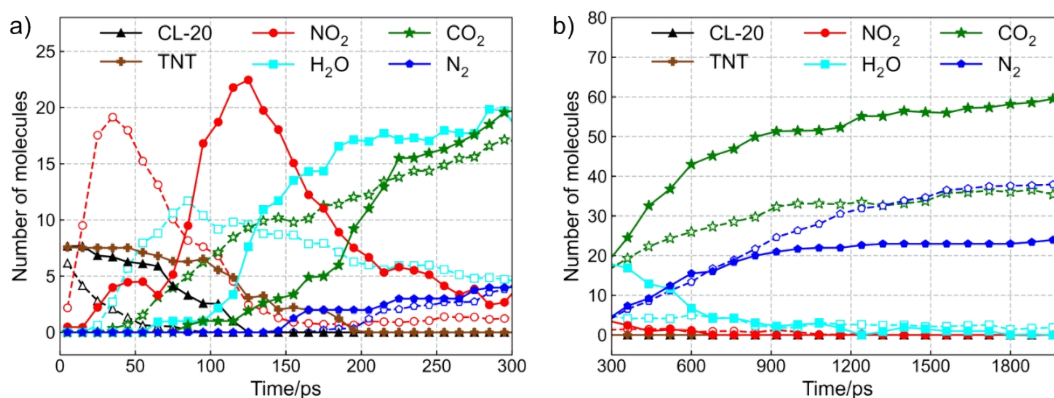

**Figure S1.** Evolution of the number of reactants and products during the MD simulations of pure CL-20 and CL-20/TNT systems at 1500 K. The dotted lines with hollow patterns represent the pure CL-20 system, and the solid lines with solid patterns represent the CL-20/TNT system. (a) for the first 300 ps. (b) from 300 ps to 2 ns.

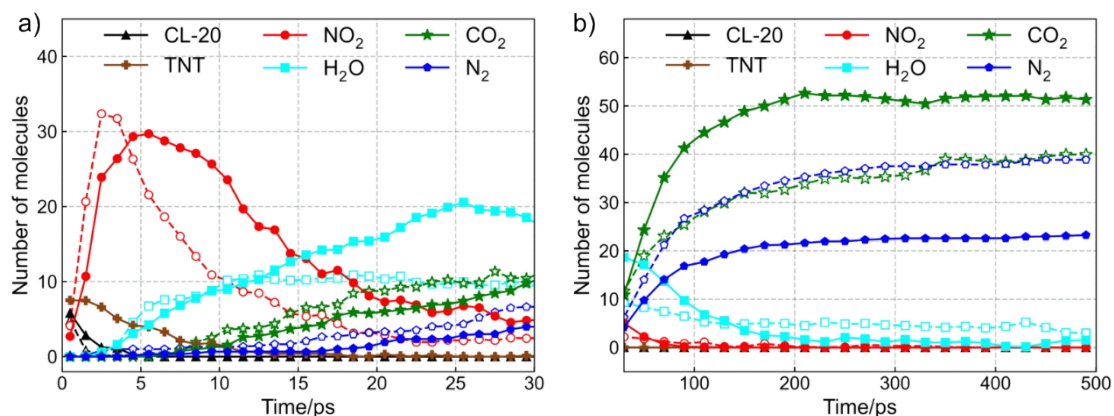

**Figure S2.** Evolution of the number of reactants and products during the MD simulations of pure CL-20 and CL-20/TNT systems at 2000 K. The dotted lines with hollow patterns represent the pure CL-20 system, and the solid lines with solid patterns represent the CL-20 /TNT system. (a) for the first 30 ps. (b) from 30 ps to 500 ps.

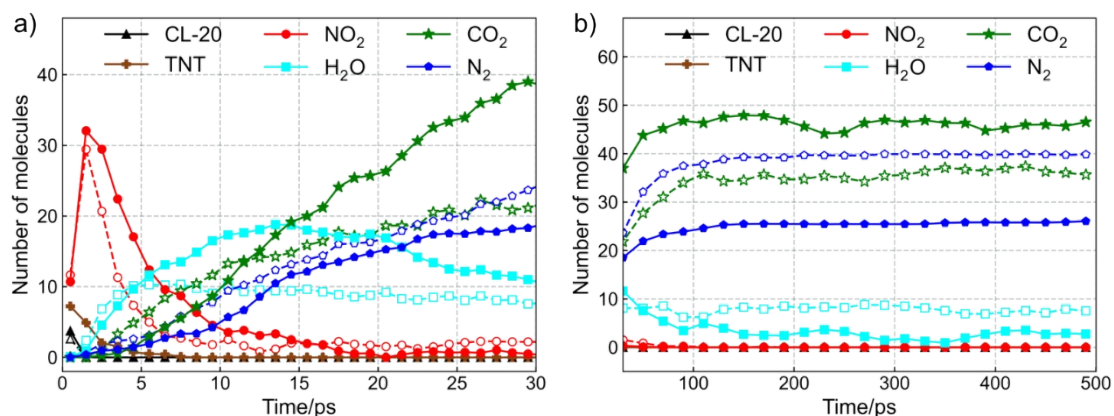

**Figure S3.** Evolution of the number of reactants and products during the MD simulations of pure CL-20 and CL-20/TNT systems at 2500 K. The dotted lines with hollow patterns represent the pure CL-20 system, and the solid lines with solid patterns represent the CL-20/TNT system. (a) for the first 30 ps. (b) from 30 ps to 500 ps.

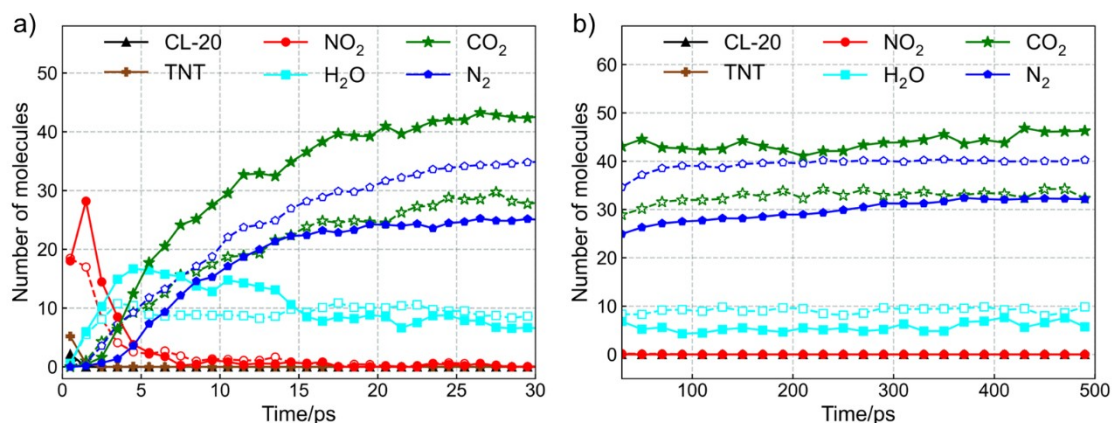

**Figure S4.** Evolution of the number of reactants and products during the MD simulations of pure CL-20 and CL-20/TNT systems at 3000 K. The dotted lines with hollow patterns represent the pure CL-20 system, and the solid lines with solid patterns represent the CL-20/TNT system. (a) for the first 30 ps. (b) from 30 ps to 500 ps.

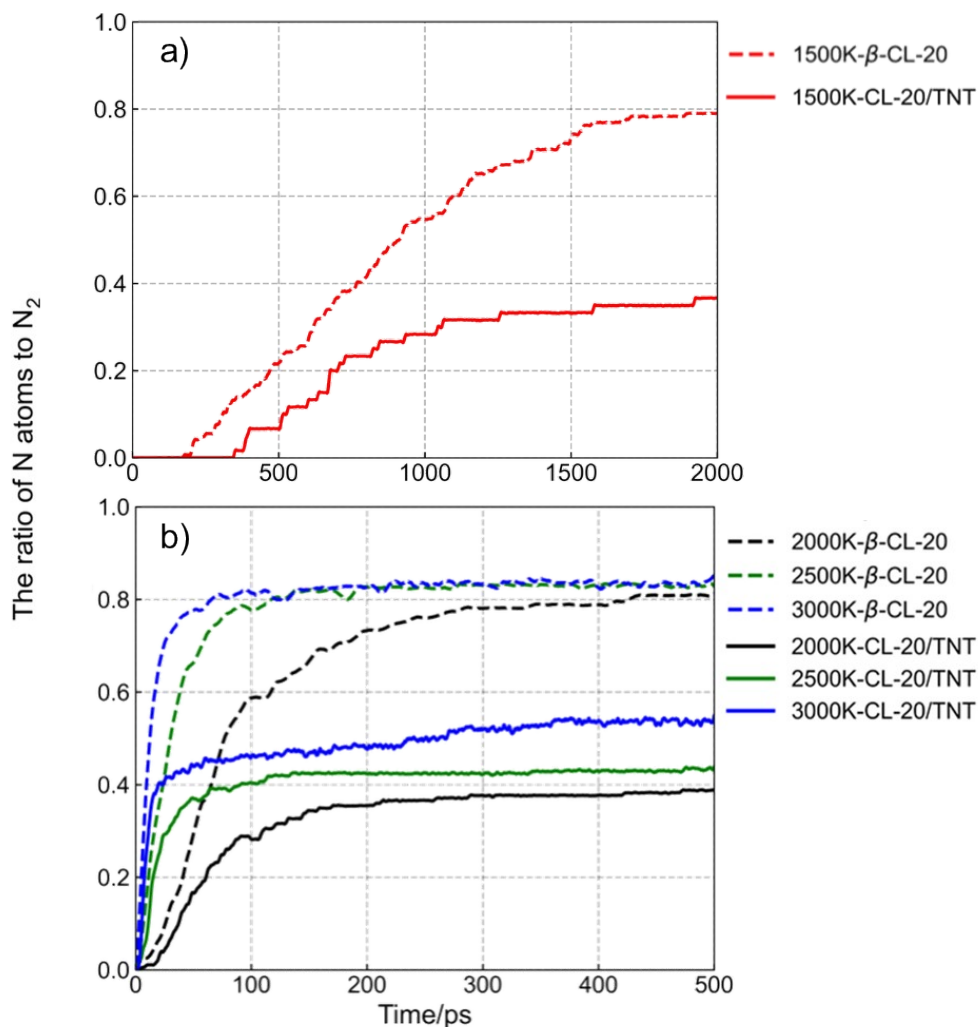

**Figure S5.** The conversion ratio of N atoms to N<sub>2</sub> molecules during the MD simulations of pure CL-20 and CL-20/TNT at (a)1500 K and (b)2000 K, 2500 K, and 3000 K.

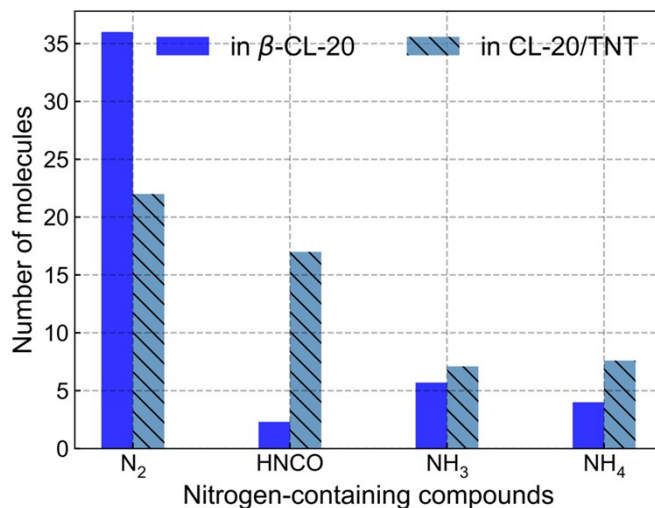

**Figure S6.** The production of main nitrogen-containing compounds in MD simulations of pure CL-20 and CL-20/TNT at 1500 K.

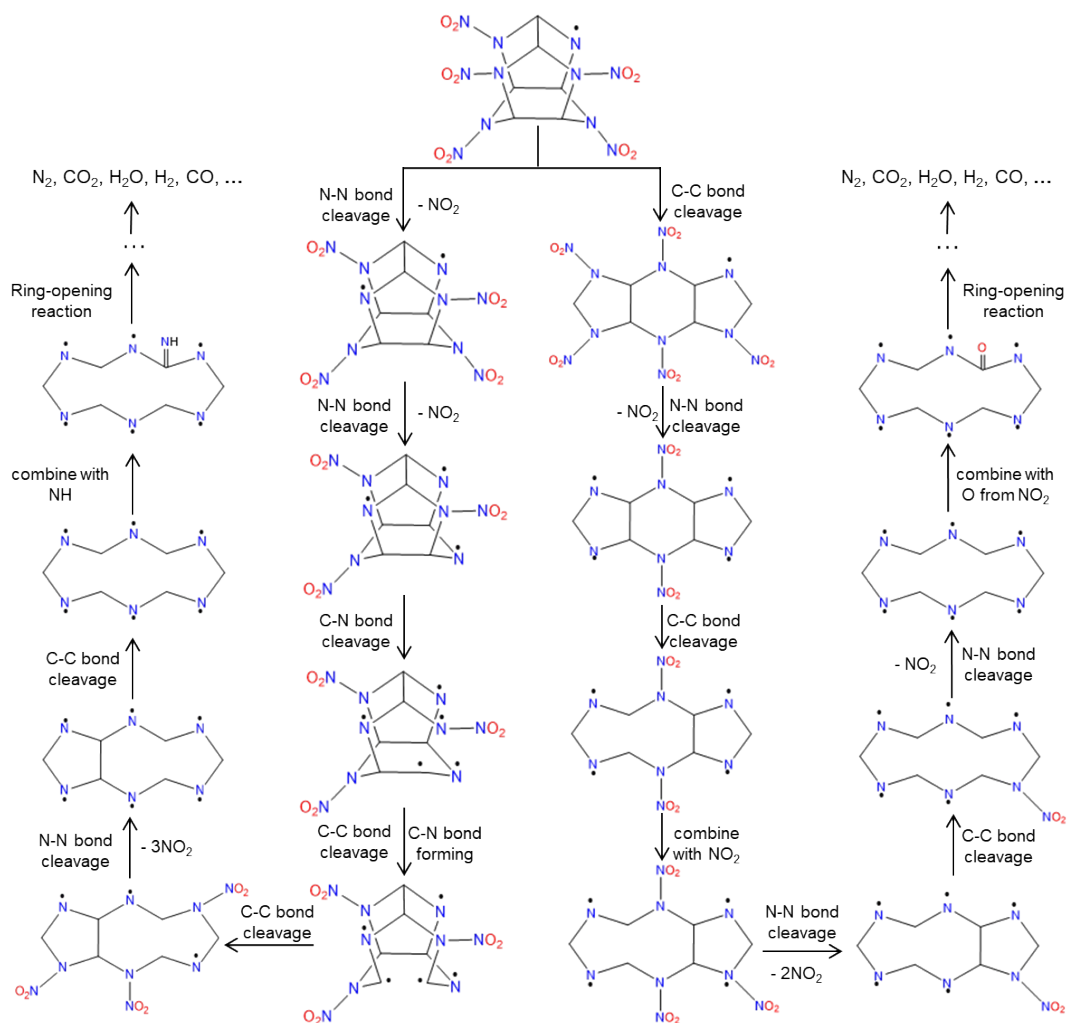

**Figure S7.** Continue from the most initial reaction of CL-20 cleavage to the next reaction paths in pure CL-20 system obtained in the heating simulations (1500 ~3000 K).

## 2. A sample input file for DFT calculation.

```
&GLOBAL
PROJECT DPGEN
&END GLOBAL
&FORCE_EVAL
METHOD QS
STRESS_TENSOR ANALYTICAL
&DFT
BASIS_SET_FILE_NAME /home/test/soft/cp2k-8.1/data/BASIS_MOLOPT
POTENTIAL_FILE_NAME /home/test/soft/cp2k-8.1/data/GTH_POTENTIALS
CHARGE 0
UKS F
MULTIPLICITY 1
&MGRID
CUTOFF 400
REL_CUTOFF 50
NGRIDS 4
&END MGRID
&QS
EPS_DEFAULT 1.0E-12
&END QS
&SCF
SCF_GUESS ATOMIC
EPS_SCF 1.0E-6
MAX_SCF 200
&OT
```

```
MINIMIZER DIIS
PRECONDITIONER FULL_SINGLE_INVERSE
&END OT
&OUTER_SCF
MAX_SCF 3
EPS_SCF 1e-06
&END OUTER_SCF
&END SCF
&XC
&XC_FUNCTIONAL PBE
&END XC_FUNCTIONAL
&VDW_POTENTIAL
POTENTIAL_TYPE PAIR_POTENTIAL
&PAIR_POTENTIAL
TYPE DFTD3
PARAMETER_FILE_NAME /home/test/soft/cp2k-8.1/data/dftd3.dat
REFERENCE_FUNCTIONAL PBE
&END PAIR_POTENTIAL
&END VDW_POTENTIAL
&END XC
&END DFT
&SUBSYS
&CELL
A 9.674 0. 0.
B 0. 19.369 0.
C 0. 0. 24.69
&END CELL
```

```
&COORD
@include sample.xyz
&END COORD
&KIND O
BASIS_SET DZVP-MOLOPT-GTH
POTENTIAL GTH-PBE-q6
&END KIND
&KIND N
BASIS_SET DZVP-MOLOPT-GTH
POTENTIAL GTH-PBE-q5
&END KIND
&KIND C
BASIS_SET DZVP-MOLOPT-GTH
POTENTIAL GTH-PBE-q4
&END KIND
&KIND H
BASIS_SET DZVP-MOLOPT-GTH
POTENTIAL GTH-PBE-q1
&END KIND
&END SUBSYS
&PRINT
&FORCES ON
&END FORCES
&END PRINT
&END FORCE_EVAL
```

### 3. A sample input file for MD simulation.

```
units          metal
boundary       p p p
atom_style     atomic
neighbor       1.0 bin
box            tilt large
read_data      conf.lmp
change_box     all triclinic
mass           1 1.007940
mass           2 12.010700
mass           3 14.006700
mass           4 15.999400

pair_style     deepmd ../graph.000.pb ../graph.001.pb ../graph.002.pb ../graph.003.pb
out_freq 100 out_file model_devi.out relative 1.0

pair_coeff

thermo_style   custom step temp pe ke etotal press vol lx ly lz xy xz yz
thermo         100
dump           1 all custom 100 traj/*.lammppstrj id type x y z
velocity       all create 3000 178100
fix            1 all nvt temp 3000 3000 100
timestep       0.000100
run            5000000
```
